# Supplementary material for: A Novel Combination Approach Targeting an Enhanced Protein Synthesis Pathway in MYC-driven (Group 3) Medulloblastoma
Source: Oxford University Press journal article supplement (doi:10.1158/1535-7163.mct-19-0996), 2020-05-05
Supplement: 15357163mct190996-sup-230889_3_supp_6168449_q7ddr3.docx [file 15357163mct190996-sup-230889_3_supp_6168449_q7ddr3.docx]

| **Gene** | **R-value** | **p-value** | **Gene** | **R-value** | **p-value** |
| --- | --- | --- | --- | --- | --- |
| RPL12 | 0.849 | 4.00E-37 | RPL28 | 0.713 | 3.00E-21 |
| RPS2 | 0.839 | 1.60E-35 | RPS16 | 0.71 | 5.30E-21 |
| RPL10A | 0.812 | 1.80E-31 | RPL5 | 0.709 | 6.50E-21 |
| RPS6 | 0.803 | 2.40E-30 | EIF3A | 0.708 | 7.20E-21 |
| RPL7A | 0.801 | 3.60E-30 | RPL24 | 0.704 | 1.40E-2 |
| RPL39 | 0.79 | 8.80E-29 | POLR3D | 0.701 | 2.50E-20 |
| RPS18 | 0.796 | 1.40E-29 | RPL9 | 0.699 | 4.10E-20 |
| RPL39 | 0.79 | 8.80E-29 | RPL23A | 0.69 | 2.00E-19 |
| EIF3H | 0.788 | 1.50E-28 | EIF3D | 0.69 | 1.80E-19 |
| RPL14 | 0.787 | 1.70E-28 | RPS13 | 0.689 | 2.20E-19 |
| RPS3 | 0.787 | 1.70E-28 | EIF3M | 0.688 | 2.60E-19 |
| RPS8 | 0.783 | 4.90E-28 | POLR1E | 0.688 | 2.60E-19 |
| RPS27 | 0.782 | 6.50E-28 | RPS27A | 0.684 | 4.80E-19 |
| RPS5 | 0.779 | 1.20E-27 | NOP14 | 0.683 | 5.90E-19 |
| RPS17 | 0.779 | 1.20E-27 | EIF3B | 0.676 | 1.90E-18 |
| EIF3E | 0.778 | 1.60E-27 | RPL11 | 0.676 | 1.80E-18 |
| RPL7 | 0.776 | 2.90E-27 | RPL18A | 0.675 | 2.20E-18 |
| RPL30 | 0.775 | 3.80E-27 | DEPTOR | 0.674 | 2.70E-18 |
| RPL35 | 0.772 | 7.60E-27 | RPL34 | 0.673 | 2.80E-18 |
| RPS20 | 0.768 | 2.20E-26 | RPL18 | 0.672 | 3.60E-18 |
| EEF1D | 0.765 | 3.80E-26 | RPL36 | 0.672 | 3.50E-18 |
| RPL6 | 0.763 | 5.40E-26 | RPS11 | 0.665 | 1.10E-17 |
| RPS19 | 0.762 | 7.50E-26 | RPL35A | 0.658 | 2.90E-17 |
| EEF2 | 0.755 | 3.90E-25 | EIF2A | 0.625 | 3.40E-15 |
| RPLP0 | 0.752 | 7.90E-25 | EIF4A1 | 0.614 | 1.50E-14 |
| EIF2C2 | 0.75 | 1.20E-24 | EIF3I | 0.573 | 2.10E-12 |
| RPLP1 | 0.749 | 1.70E-24 | EIF4G1 | 0.553 | 1.80E-11 |
| RPS24 | 0.742 | 7.30E-24 | POLR1C | 0.544 | 4.40E-11 |
| RPL8 | 0.741 | 8.70E-24 | POLD2 | 0.531 | 1.60E-10 |
| RPS10 | 0.737 | 2.00E-23 | NOP2 | 0.511 | 1.00E-09 |
| RPL37A | 0.735 | 3.60E-23 | EEF1B2 | 0.487 | 8.60E-09 |
| RPL29 | 0.735 | 3.10E-23 | EIF4A2 | 0.4 | 5.00E-06 |
| RPP40 | 0.734 | 4.60E-23 |
| RPL31 | 0.732 | 6.50E-23 |
| EIF3L | 0.729 | 1.30E-22 |
| RPL3 | 0.727 | 1.70E-22 |
| EIF4EBP1 | 0.725 | 2.80E-22 |
| RPS25 | 0.724 | 2.90E-22 |
| NPM3 | 0.72 | 7.90E-22 |
| EIF4B | 0.717 | 1.40E-21 |
| RPS7 | 0.717 | 1.30E-21 |

**Supplementary Table S1. The list of genes whose expression were positively and strongly correlated with MYC expression in Group 3 MB**. This correlation analysis was performed using Cavalli data-set (n=144, Group 3 MB) at R2-Genomics online platform.
